# Supplementary material for: Analytic Approximate Solutions to the Boundary Layer Flow Equation over a Stretching Wall with Partial Slip at the Boundary
Source: PLOS journal article supplement (doi:10.1371/journal.pone.0149334), 2016-03-31

# Analytic approximate solutions to the boundary layer flow equation over a stretching wall with partial slip at the boundary

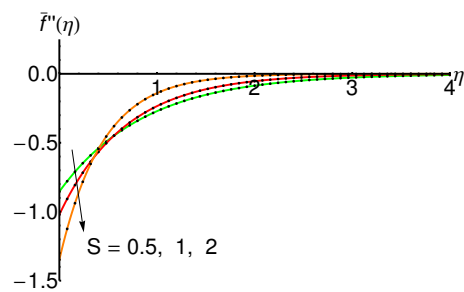

Supplement: S10 (10.1371/journal.pone.0149334.s010) [file journal.pone.0149334.s010]
